# Supplementary material for: Physical Inactivity and Sedentarism during and after Admission with Community-Acquired Pneumonia and the Risk of Readmission and Mortality: A Prospective Cohort Study
Source: MDPI journal article supplement (doi:10.3390/jcm11195923), 2022-10-07
Supplement: s1 [file s1]

## Supplementary

**Table S1.** Physical activity level prior to admission between patients included before the COVID-19 lockdown compared to patients included during or after the lockdown.

|                 | Before COVID-19 lockdown (n = 55) | During or after COVID-19 lockdown (n = 96) | P-value |
|-----------------|-----------------------------------|--------------------------------------------|---------|
| Low, n (%)      | 42 (76.4)                         | 79 (82.3)                                  | 0.380   |
| Moderate, n (%) | 10 (18.2)                         | 10 (10.4)                                  | 0.176   |
| High, n (%)     | 3 (5.5)                           | 7 (7.3)                                    | 0.662   |

Comparisons were made with Chi-squared tests.

**Table S2.** Cause of 30-day readmission

| Cause of readmission  |           |
|-----------------------|-----------|
| Pulmonary, n (%)      | 19 (51.4) |
| Cardiovascular, n (%) | 6 (16.2)  |
| Malignant, n (%)      | 3 (8.1)   |
| Infection, n (%)      | 3 (8.1)   |
| Neurological, n (%)   | 2 (5.4)   |
| Other, n (%)          | 4 (10.8)  |
